# Supplementary material for: Fundamental differences between glassy dynamics in two and three dimensions
Source: PubMed Central journal article supplement (PMC4490572; doi:10.1038/ncomms8392), 2015-06-12
Supplement: ncomms8392-s1.pdf [file ncomms8392-s1.pdf]

## Supplementary Figures

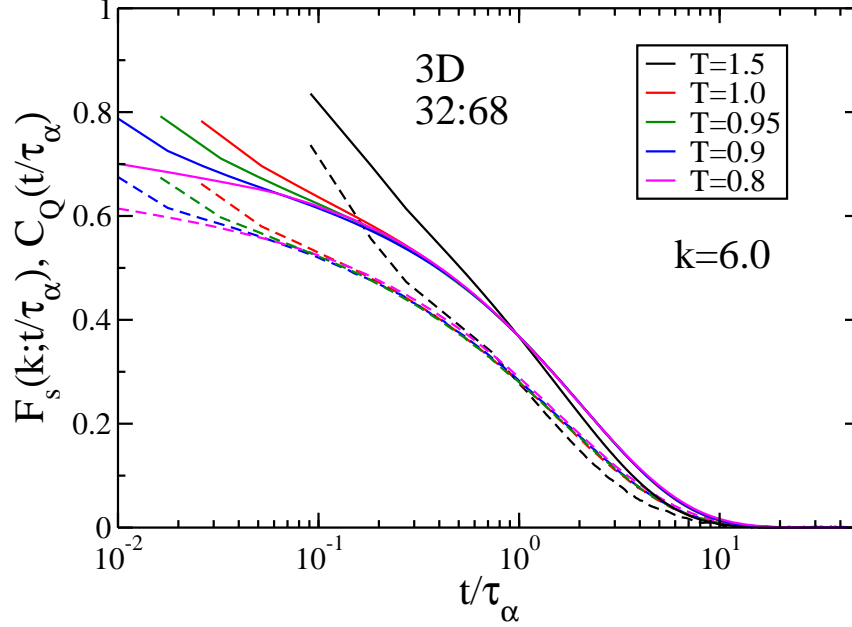

**Supplementary Figure 1: Translational and bond-orientational relaxation in 3D.** The self-intermediate scattering function  $F_s(k; t)$  (solid lines) and the bond-orientational correlation function  $C_Q(t)$  (dashed lines) rescaled by the alpha-relaxation time  $\tau_\alpha$  in 3D. We define  $\tau_\alpha$  as when  $F_s(\tau_\alpha) = e^{-1}$ . The system is the 32:68 system described in Methods.

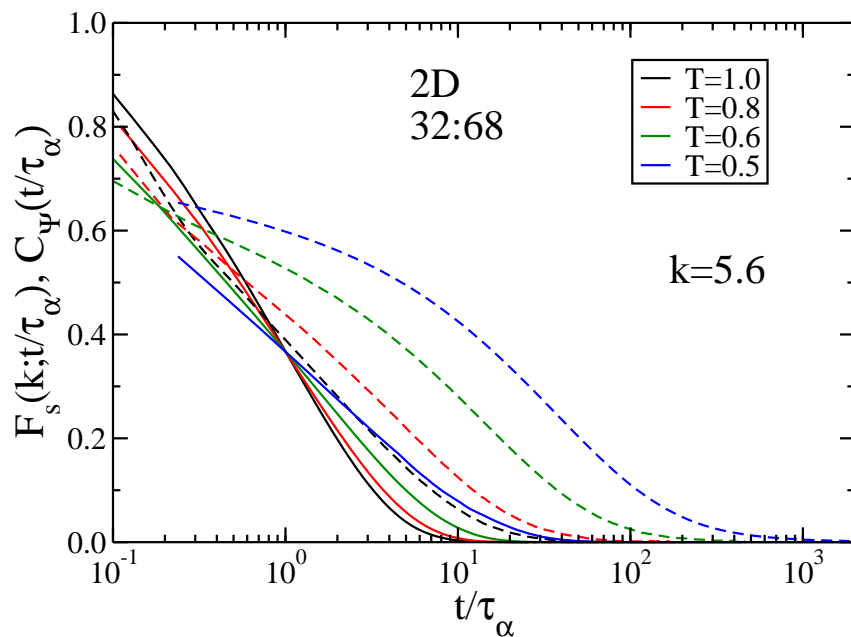

**Supplementary Figure 2: Translational and bond-orientational relaxation in 2D.** The self-intermediate scattering function  $F_s(k; t)$  (solid lines) and the bond-orientational correlation function  $C_\Psi(t)$  (dashed lines) rescaled by the alpha-relaxation time  $\tau_\alpha$  in 2D. We define  $\tau_\alpha$  as when  $F_s(\tau_\alpha) = e^{-1}$ . The system is the 32:68 system described in Methods.

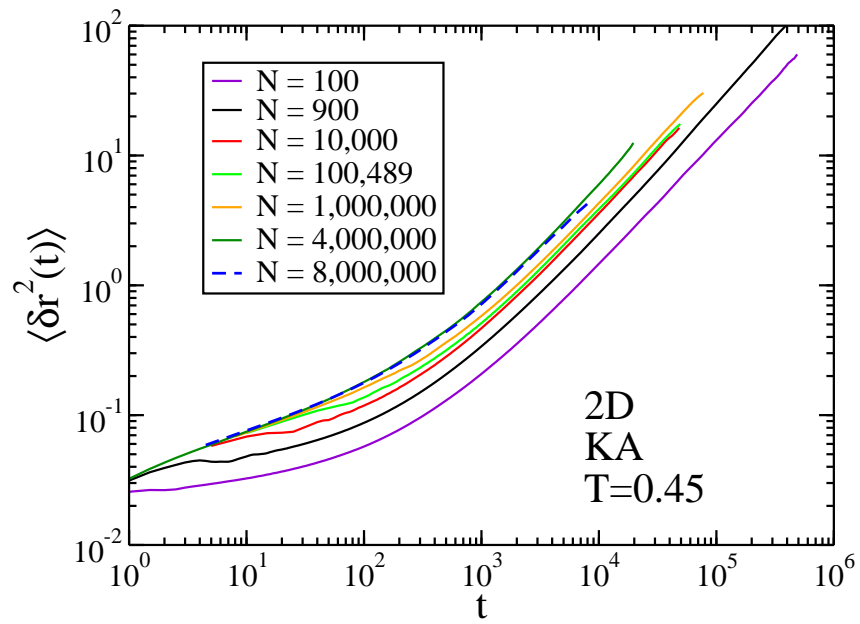

**Supplementary Figure 3: Mean square displacement finite size effects.** The mean square displacement for the two-dimensional KA system for different system sizes at  $T = 0.45$ .

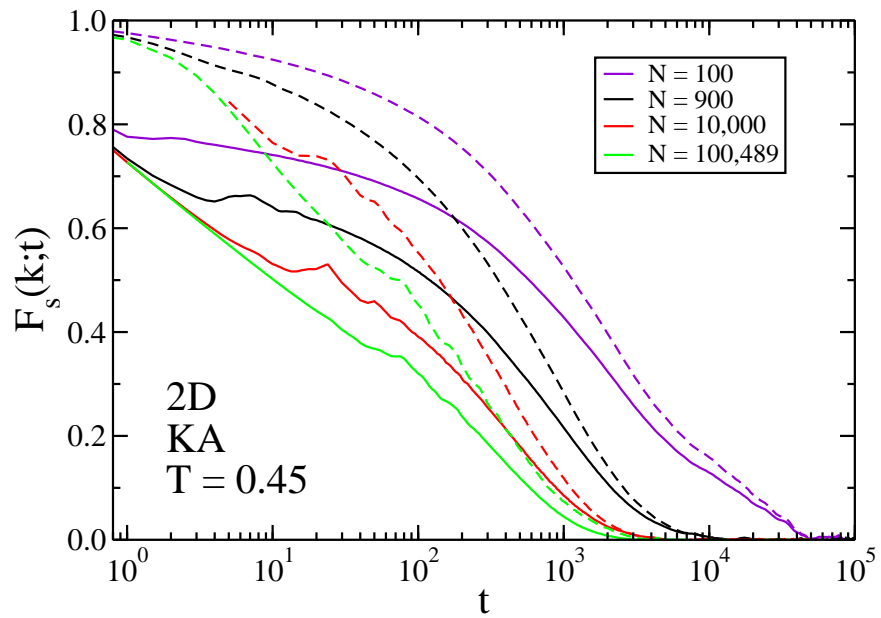

**Supplementary Figure 4: Inherent structure finite size effects.** The self-intermediate scattering function for the standard Newtonian dynamics (solid lines) and the inherent structure dynamics (dashed lines) for the two-dimensional KA system for different system sizes at  $T = 0.45$ .

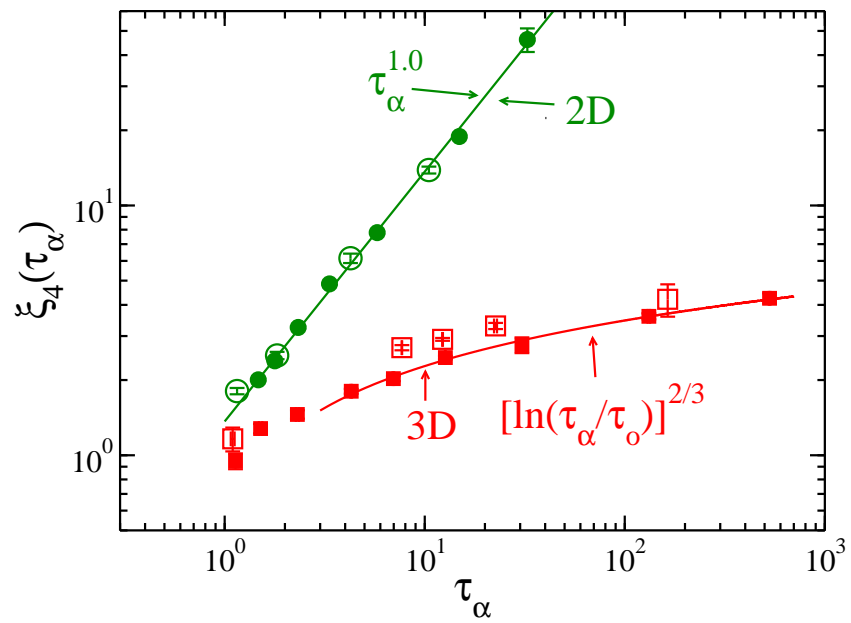

**Supplementary Figure 5: Dynamic correlation length in 2D and 3D.** The dynamic correlation length  $\xi_4(\tau_\alpha)$  versus the alpha-relaxation time  $\tau_\alpha$  for the KA system (filled symbols) and the 32:68 system (open symbols) in 2D (green circles) and 3D (red squares).
